# Supplementary material for: Clinical and prognostic characteristics of stable bronchiectasis in adults with pseudomonas aeruginosa colonization: a prospective cohort study
Source: Research Square preprint supplement (doi:10.21203/rs.3.rs-8049188/v1), 2025-11-26
Supplement: Supplementary file 1 [file 82c0e15abed0df8778ddd3e0.docx]

**Supplementary Table S1.** Comparison of baseline characteristics before and after PSM: PA colonization and lung function association

| Clinical parameters | Before PSM | | | |  | After PSM | | | |
| --- | --- | --- | --- | --- | --- | --- | --- | --- | --- |
| non-PA colonization (n = 152) | PA colonization  (n = 58) | *P-value* | SMD | non-PA colonization (n = 55) | PA colonization  (n = 32) | *P-value* | SMD |
| Age, years, mean ± SD | 62.70 ± 10.14 | 63.79 ± 9.04 | 0.472 | 0.121 |  | 63.91 ± 8.75 | 61.56 ± 10.44 | 0.265 | -0.225 |
| Female, n (%) | 104 (68.42) | 40 (68.97) | 0.939 | 0.012 |  | 42 (76.36) | 20 (62.50) | 0.168 | -0.286 |
| BMI, kg/m2, median (IQR) | 18.31 (17.37, 19.18) | 17.55 (16.84, 18.88) | 0.004 | -0.436 |  | 18.00 (17.22, 18.99) | 18.13 (17.00, 19.11) | 0.874 | 0.018 |
| BMI<18.5 kg/m², n (%) | 88 (57.89) | 42 (72.41) | 0.053 | 0.325 |  | 34 (61.82) | 19 (59.38) | 0.822 | -0.050 |
| Bronchiectasis duration, years, median (IQR) | 14.00 (9.75, 17.00) | 15.00 (11.00, 20.75) | 0.024 | 0.349 |  | 14.00 (10.00, 18.00) | 14.00 (9.00, 17.50) | 0.937 | 0.008 |
| Number of lobes affected, median (IQR) | 3.00 (2.00, 4.00) | 4.00 (3.00, 5.00) | <0.001 | 0.785 |  | 4.00 (3.00, 4.50) | 4.00 (3.00, 4.25) | 0.651 | 0.095 |
| Number of lobes affected≥3, n (%) | 105 (69.08) | 51 (87.93) | 0.005 | 0.579 |  | 49 (89.09) | 28 (87.50) | 1.000 | -0.048 |
| Bronchiectasis type, n (%) |  |  | 0.667 |  |  |  |  | 0.857 |  |
| Columnar | 74 (48.68) | 30 (51.72) |  | 0.061 |  | 26 (47.27) | 17 (53.12) |  | 0.117 |
| Cystic columnar | 55 (36.18) | 22 (37.93) |  | 0.036 |  | 22 (40.00) | 11 (34.38) |  | -0.118 |
| Cystic | 23 (15.13) | 6 (10.34) |  | -0.157 |  | 7 (12.73) | 4 (12.50) |  | -0.007 |
| Modified Reiff score, median (IQR) | 4.00 (3.00, 8.00) | 5.00 (4.00, 8.00) | 0.009 | 0.257 |  | 5.00 (3.00, 8.50) | 5.00 (4.00, 8.00) | 0.851 | -0.094 |
| BSI score, median (IQR) | 6.00 (4.00, 8.00) | 8.00 (6.00, 8.00) | 0.003 | 0.359 |  | 6.00 (4.00, 8.00) | 6.00 (4.00, 8.00) | 0.744 | -0.106 |
| E-FACED score, median (IQR) | 1.00 (1.00, 3.00) | 1.00 (1.00, 3.00) | 0.148 | 0.179 |  | 1.00 (1.00, 3.00) | 1.00 (1.00, 2.25) | 0.796 | -0.069 |
| Number of exacerbations in the prior year, median (IQR) | 1.00 (0.00, 2.00) | 3.00 (2.00, 3.00) | <0.001 | 0.545 |  | 2.00 (0.50, 3.00) | 2.00 (0.00, 3.00) | 0.812 | -0.103 |
| Exacerbation-related hospitalizations in the prior year, n (%) | 69 (45.39) | 32 (55.17) | 0.205 | 0.197 |  | 29 (52.73) | 16 (50.00) | 0.806 | -0.055 |
| Chronic PA colonization, n (%) | 46 (30.26) | 40 (68.97) | <0.001 | 0.837 |  | 22 (40.00) | 16 (50.00) | 0.364 | 0.200 |
| Colonization with other bacteria, n (%) | 50 (32.89) | 7 (12.07) | 0.002 | -0.639 |  | 17 (30.91) | 7 (21.88) | 0.363 | -0.219 |
| Hemoptysis in the prior year, n (%) | 32 (21.05) | 24 (41.38) | 0.003 | 0.413 |  | 19 (34.55) | 10 (31.25) | 0.753 | -0.071 |
| Ex-smoker or current smoker, n (%) | 24 (15.79) | 10 (17.24) | 0.798 | 0.038 |  | 7 (12.73) | 7 (21.88) | 0.263 | 0.221 |
| Alcohol abuse, n (%) | 65 (42.76) | 28 (48.28) | 0.472 | 0.110 |  | 21 (38.18) | 16 (50.00) | 0.282 | 0.236 |
| Pulmonary tuberculosis, n (%) | 46 (30.26) | 18 (31.03) | 0.914 | 0.017 |  | 24 (43.64) | 6 (18.75) | 0.019 | -0.638 |
| Pneumonia, n (%) | 22 (14.47) | 12 (20.69) | 0.274 | 0.153 |  | 9 (16.36) | 8 (25.00) | 0.327 | 0.199 |
| Pertussis, n (%) | 11 (7.24) | 3 (5.17) | 0.821 | -0.093 |  | 3 (5.45) | 0 (0.00) | 0.462 | -0.302 |
| Measles, n (%) | 4 (2.63) | 3 (5.17) | 0.626 | 0.115 |  | 0 (0.00) | 2 (6.25) | 0.133 | 0.258 |
| Chronic sinusitis, n (%) | 21 (13.82) | 10 (17.24) | 0.532 | 0.091 |  | 7 (12.73) | 5 (15.62) | 0.956 | 0.080 |
| Allergic rhinitis, n (%) | 9 (5.92) | 3 (5.17) | 1.000 | -0.034 |  | 5 (9.09) | 3 (9.38) | 1.000 | 0.010 |
| Gastroesophageal reflux disease, n (%) | 6 (3.95) | 3 (5.17) | 0.991 | 0.055 |  | 3 (5.45) | 2 (6.25) | 1.000 | 0.033 |
| Diabetes, n (%) | 46 (30.26) | 19 (32.76) | 0.727 | 0.053 |  | 18 (32.73) | 8 (25.00) | 0.448 | -0.178 |
| Hypertension, n (%) | 57 (37.50) | 26 (44.83) | 0.331 | 0.147 |  | 17 (30.91) | 13 (40.62) | 0.358 | 0.198 |
| Coronary heart disease, n (%) | 81 (53.29) | 31 (53.45) | 0.984 | 0.003 |  | 33 (60.00) | 11 (34.38) | 0.021 | -0.540 |
| Liver disease, n (%) | 11 (7.24) | 5 (8.62) | 0.962 | 0.049 |  | 5 (9.09) | 3 (9.38) | 1.000 | 0.010 |
| Kidney disease, n (%) | 6 (3.95) | 3 (5.17) | 0.991 | 0.055 |  | 2 (3.64) | 2 (6.25) | 0.976 | 0.108 |
| Cerebral vascular disease, n (%) | 59 (38.82) | 23 (39.66) | 0.911 | 0.017 |  | 22 (40.00) | 7 (21.88) | 0.084 | -0.438 |
| Purulent sputum, n (%) | 76 (50.00) | 52 (89.66) | <0.001 | 1.302 |  | 39 (70.91) | 26 (81.25) | 0.285 | 0.265 |
| Cough, n (%) | 89 (58.55) | 43 (74.14) | 0.037 | 0.356 |  | 37 (67.27) | 22 (68.75) | 0.887 | 0.032 |
| Hemoptysis, n (%) | 18 (11.84) | 8 (13.79) | 0.701 | 0.057 |  | 4 (7.27) | 5 (15.62) | 0.385 | 0.230 |
| Wheezes, n (%) | 73 (48.03) | 41 (70.69) | 0.003 | 0.498 |  | 34 (61.82) | 19 (59.38) | 0.822 | -0.050 |
| Crackles, n (%) | 40 (26.32) | 27 (46.55) | 0.005 | 0.406 |  | 19 (34.55) | 11 (34.38) | 0.987 | -0.004 |
| WBC, ×109/L, mean ± SD | 7.96 ± 1.79 | 7.92 ± 2.02 | 0.908 | -0.016 |  | 7.87 ± 1.72 | 7.69 ± 1.91 | 0.655 | -0.094 |
| CD4+/CD8+ ratio, mean ± SD | 1.02 ± 0.19 | 1.05 ± 0.21 | 0.450 | 0.110 |  | 1.04 ± 0.19 | 1.03 ± 0.19 | 0.884 | -0.032 |
| CRP, mg/L, median (IQR) | 7.95 (5.95, 10.80) | 12.30 (7.65, 17.70) | <0.001 | 0.570 |  | 9.50 (6.60, 13.30) | 10.10 (6.40, 15.85) | 0.544 | 0.146 |
| Albumin, g/L, median (IQR) | 38.00 (34.00, 44.00) | 37.50 (34.25, 44.00) | 0.981 | -0.006 |  | 37.00 (35.00, 43.00) | 37.00 (34.00, 43.25) | 0.618 | -0.131 |
| NEU, ×109/L, median (IQR) | 2.70 (2.30, 3.30) | 2.85 (2.32, 3.20) | 0.466 | 0.109 |  | 2.70 (2.50, 3.20) | 2.80 (2.38, 3.12) | 0.853 | 0.017 |
| EOS, ×109/L, median (IQR) | 0.26 (0.13, 0.37) | 0.20 (0.10, 0.29) | 0.175 | -0.202 |  | 0.23 (0.09, 0.36) | 0.26 (0.15, 0.37) | 0.423 | 0.186 |
| CD4+T cell counts, μL, median (IQR) | 493.00 (439.75, 553.00) | 485.50 (431.00, 529.75) | 0.250 | -0.216 |  | 492.00 (446.00, 552.00) | 486.50 (443.50, 522.25) | 0.520 | -0.139 |
| CD8+T cell counts, μL, median (IQR) | 494.50 (425.75, 554.25) | 482.00 (403.25, 540.25) | 0.382 | -0.128 |  | 486.00 (422.00, 533.50) | 488.50 (418.25, 538.75) | 0.705 | 0.110 |
| CD19+B cell counts, μL, median (IQR) | 235.00 (187.00, 304.00) | 267.00 (187.50, 331.25) | 0.116 | 0.247 |  | 253.00 (182.00, 313.00) | 251.00 (186.50, 324.50) | 0.765 | 0.046 |
| CD16+CD56+NK cell counts, μL, median (IQR) | 364.50 (232.50, 465.00) | 428.50 (323.25, 522.00) | 0.005 | 0.486 |  | 378.00 (279.00, 498.00) | 388.00 (319.00, 473.75) | 0.979 | -0.001 |
| FeNO, ppb, mean ± SD | 13.03 ± 6.92 | 12.52 ± 6.70 | 0.631 | -0.076 |  | 11.51 ± 7.01 | 12.69 ± 6.83 | 0.448 | 0.172 |

Abbreviations: SMD Standardized mean difference
