# Supplementary material for: Clinical and prognostic characteristics of stable bronchiectasis in adults with pseudomonas aeruginosa colonization: a prospective cohort study
Source: Research Square preprint supplement (doi:10.21203/rs.3.rs-8049188/v1), 2025-11-26
Supplement: Supplementary file 2 [file b44a037603f83abbd905879b.docx]

**Supplementary Table S2.** Comparison of baseline characteristics before and after PSM: association between PA colonization and one-year exacerbation risk in bronchiectasis

| Clinical parameters | Before PSM | | | |  | After PSM | | | |
| --- | --- | --- | --- | --- | --- | --- | --- | --- | --- |
| non-PA colonization (n = 273) | PA colonization  (n = 118) | *P-value* | SMD | non-PA colonization (n = 86) | PA colonization  (n = 56) | *P-value* | SMD |
| Age, years, mean ± SD | 61.00 ± 11.11 | 63.60 ± 7.99 | 0.010 | 0.325 |  | 61.44 ± 10.74 | 63.23 ± 9.28 | 0.308 | 0.193 |
| Female, n (%) | 177 (64.84) | 76 (64.41) | 0.935 | -0.009 |  | 55 (63.95) | 35 (62.50) | 0.861 | -0.030 |
| BMI, kg/m2, median (IQR) | 18.64 (17.44, 19.66) | 17.93 (16.93, 18.90) | <0.001 | -0.619 |  | 18.43 (17.24, 19.25) | 18.35 (17.40, 19.05) | 0.853 | -0.052 |
| BMI<18.5 kg/m², n (%) | 128 (46.89) | 82 (69.49) | <0.001 | 0.491 |  | 44 (51.16) | 32 (57.14) | 0.485 | 0.121 |
| Bronchiectasis duration, years, median (IQR) | 13.00 (8.00, 17.00) | 15.00 (11.00, 20.00) | <0.001 | 0.429 |  | 14.00 (9.00, 18.75) | 14.00 (9.75, 20.25) | 0.770 | 0.050 |
| Number of lobes affected, median (IQR) | 3.00 (2.00, 4.00) | 4.00 (3.00, 5.00) | <0.001 | 0.775 |  | 3.00 (2.25, 4.00) | 3.00 (3.00, 4.00) | 0.614 | 0.116 |
| Number of lobes affected≥3, n (%) | 167 (61.17) | 99 (83.90) | <0.001 | 0.618 |  | 64 (74.42) | 43 (76.79) | 0.749 | 0.056 |
| Bronchiectasis type, n (%) |  |  | 0.193 |  |  |  |  | 0.638 |  |
| Columnar | 168 (61.54) | 61 (51.69) |  | -0.197 |  | 51 (59.30) | 29 (51.79) |  | -0.150 |
| Cystic columnar | 70 (25.64) | 38 (32.20) |  | 0.140 |  | 26 (30.23) | 19 (33.93) |  | 0.078 |
| Cystic | 35 (12.82) | 19 (16.10) |  | 0.089 |  | 9 (10.47) | 8 (14.29) |  | 0.109 |
| Modified Reiff score, median (IQR) | 3.00 (2.00, 6.00) | 5.00 (4.00, 8.00) | <0.001 | 0.463 |  | 4.00 (3.00, 6.00) | 4.00 (3.00, 6.00) | 0.265 | 0.164 |
| BSI score, median (IQR) | 6.00 (4.00, 6.00) | 6.00 (6.00, 8.00) | <0.001 | 0.532 |  | 6.00 (4.00, 8.00) | 6.00 (4.00, 8.00) | 0.302 | 0.190 |
| E-FACED score, median (IQR) | 1.00 (0.00, 1.00) | 1.00 (1.00, 2.00) | 0.002 | 0.261 |  | 1.00 (1.00, 1.00) | 1.00 (1.00, 2.00) | 0.536 | 0.109 |
| Number of exacerbations in the prior year, median (IQR) | 1.00 (0.00, 2.00) | 2.00 (0.00, 3.00) | <0.001 | 0.578 |  | 1.50 (0.00, 3.00) | 2.00 (0.00, 3.00) | 0.372 | 0.139 |
| Exacerbation-related hospitalizations in the prior year, n (%) | 85 (31.14) | 54 (45.76) | 0.006 | 0.294 |  | 31 (36.05) | 23 (41.07) | 0.547 | 0.102 |
| Chronic PA colonization, n (%) | 69 (25.27) | 80 (67.80) | <0.001 | 0.910 |  | 36 (41.86) | 26 (46.43) | 0.592 | 0.092 |
| Colonization with other bacteria, n (%) | 87 (31.87) | 16 (13.56) | <0.001 | -0.535 |  | 22 (25.58) | 13 (23.21) | 0.749 | -0.056 |
| Hemoptysis in the prior year, n (%) | 49 (17.95) | 49 (41.53) | <0.001 | 0.478 |  | 23 (26.74) | 16 (28.57) | 0.812 | 0.040 |
| Ex-smoker or current smoker, n (%) | 45 (16.48) | 23 (19.49) | 0.471 | 0.076 |  | 17 (19.77) | 14 (25.00) | 0.461 | 0.121 |
| Alcohol abuse, n (%) | 126 (46.15) | 66 (55.93) | 0.076 | 0.197 |  | 51 (59.30) | 33 (58.93) | 0.965 | -0.008 |
| Pulmonary tuberculosis, n (%) | 72 (26.37) | 37 (31.36) | 0.313 | 0.107 |  | 21 (24.42) | 18 (32.14) | 0.314 | 0.165 |
| Pneumonia, n (%) | 42 (15.38) | 26 (22.03) | 0.111 | 0.160 |  | 15 (17.44) | 11 (19.64) | 0.740 | 0.055 |
| Pertussis, n (%) | 17 (6.23) | 7 (5.93) | 0.911 | -0.012 |  | 2 (2.33) | 1 (1.79) | 1.000 | -0.041 |
| Measles, n (%) | 4 (1.47) | 6 (5.08) | 0.083 | 0.165 |  | 1 (1.16) | 0 (0.00) | 1.000 | -0.139 |
| Chronic sinusitis, n (%) | 30 (10.99) | 16 (13.56) | 0.469 | 0.075 |  | 12 (13.95) | 7 (12.50) | 0.804 | -0.044 |
| Allergic rhinitis, n (%) | 17 (6.23) | 3 (2.54) | 0.129 | -0.234 |  | 6 (6.98) | 2 (3.57) | 0.626 | -0.183 |
| Gastroesophageal reflux disease, n (%) | 11 (4.03) | 4 (3.39) | 0.988 | -0.035 |  | 4 (4.65) | 3 (5.36) | 1.000 | 0.031 |
| Diabetes, n (%) | 77 (28.21) | 33 (27.97) | 0.962 | -0.005 |  | 20 (23.26) | 13 (23.21) | 0.995 | -0.001 |
| Hypertension, n (%) | 89 (32.60) | 44 (37.29) | 0.369 | 0.097 |  | 26 (30.23) | 17 (30.36) | 0.987 | 0.003 |
| Coronary heart disease, n (%) | 127 (46.52) | 62 (52.54) | 0.274 | 0.121 |  | 34 (39.53) | 24 (42.86) | 0.694 | 0.067 |
| Liver disease, n (%) | 21 (7.69) | 6 (5.08) | 0.351 | -0.119 |  | 4 (4.65) | 4 (7.14) | 0.797 | 0.097 |
| Kidney disease, n (%) | 14 (5.13) | 8 (6.78) | 0.515 | 0.066 |  | 5 (5.81) | 4 (7.14) | 1.000 | 0.052 |
| Cerebral vascular disease, n (%) | 95 (34.80) | 44 (37.29) | 0.637 | 0.051 |  | 26 (30.23) | 21 (37.50) | 0.368 | 0.150 |
| Purulent sputum, n (%) | 127 (46.52) | 100 (84.75) | <0.001 | 1.063 |  | 58 (67.44) | 42 (75.00) | 0.335 | 0.175 |
| Cough, n (%) | 140 (51.28) | 83 (70.34) | <0.001 | 0.417 |  | 51 (59.30) | 37 (66.07) | 0.417 | 0.143 |
| Hemoptysis, n (%) | 26 (9.52) | 12 (10.17) | 0.843 | 0.021 |  | 7 (8.14) | 4 (7.14) | 1.000 | -0.039 |
| Wheezes, n (%) | 126 (46.15) | 87 (73.73) | <0.001 | 0.627 |  | 52 (60.47) | 37 (66.07) | 0.500 | 0.118 |
| Crackles, n (%) | 75 (27.47) | 60 (50.85) | <0.001 | 0.468 |  | 33 (38.37) | 25 (44.64) | 0.458 | 0.126 |
| WBC, ×109/L, mean ± SD | 7.82 ± 1.86 | 8.05 ± 2.09 | 0.309 | 0.109 |  | 7.67 ± 1.32 | 7.77 ± 2.10 | 0.839 | 0.045 |
| CD4+/CD8+ ratio, mean ± SD | 1.03 ± 0.19 | 1.03 ± 0.19 | 0.824 | 0.025 |  | 1.02 ± 0.18 | 1.03 ± 0.20 | 0.731 | 0.081 |
| CRP, mg/L, median (IQR) | 8.00 (6.00, 10.90) | 12.55 (7.28, 18.32) | <0.001 | 0.554 |  | 9.30 (6.33, 12.70) | 10.70 (7.47, 16.95) | 0.197 | 0.236 |
| Albumin, g/L, median (IQR) | 38.00 (34.00, 44.00) | 37.00 (34.00, 44.00) | 0.965 | 0.015 |  | 37.50 (34.00, 42.00) | 37.50 (34.00, 44.25) | 0.581 | 0.105 |
| NEU, ×109/L, median (IQR) | 2.70 (2.30, 3.40) | 2.70 (2.30, 3.20) | 0.685 | -0.054 |  | 2.70 (2.23, 3.27) | 2.75 (2.30, 3.10) | 0.867 | -0.027 |
| EOS, ×109/L, median (IQR) | 0.27 (0.13, 0.39) | 0.22 (0.12, 0.34) | 0.084 | -0.206 |  | 0.27 (0.12, 0.41) | 0.23 (0.10, 0.34) | 0.504 | -0.125 |
| CD4+T cell counts, μL, median (IQR) | 497.00 (438.00, 557.00) | 481.50 (417.50, 534.25) | 0.008 | -0.329 |  | 487.50 (430.25, 550.25) | 479.50 (441.75, 540.50) | 0.686 | -0.084 |
| CD8+T cell counts, μL, median (IQR) | 486.00 (427.00, 552.00) | 482.50 (400.00, 536.50) | 0.093 | -0.179 |  | 483.00 (424.00, 544.75) | 489.00 (416.75, 542.00) | 0.985 | -0.012 |
| CD19+B cell counts, μL, median (IQR) | 235.00 (188.00, 310.00) | 267.00 (192.00, 335.00) | 0.088 | 0.194 |  | 240.00 (190.50, 313.00) | 259.50 (188.50, 327.50) | 0.682 | 0.076 |
| CD16+CD56+NK cell counts, μL, median (IQR) | 365.00 (256.00, 483.00) | 409.00 (276.00, 515.50) | 0.128 | 0.166 |  | 391.00 (299.75, 490.00) | 409.00 (277.50, 516.75) | 0.987 | -0.001 |
| FEV1, L, median (IQR) | 1.52 (1.33, 1.74) | 1.48 (1.27, 1.78) | 0.612 | -0.067 |  | 1.53 (1.32, 1.77) | 1.48 (1.28, 1.77) | 0.740 | -0.066 |
| FEV1%predicted, mean ± SD | 0.72 ± 0.06 | 0.71 ± 0.06 | 0.767 | -0.045 |  | 0.71 ± 0.06 | 0.71 ± 0.07 | 0.879 | -0.036 |
| FVC, L, mean ± SD | 1.93 ± 0.42 | 1.89 ± 0.43 | 0.598 | -0.080 |  | 1.91 ± 0.44 | 1.91 ± 0.43 | 0.995 | -0.002 |
| FVC%predicted, median (IQR) | 0.67 (0.61, 0.74) | 0.69 (0.62, 0.74) | 0.985 | -0.044 |  | 0.65 (0.61, 0.75) | 0.68 (0.61, 0.74) | 0.789 | 0.003 |
| FEV1/FVC, mean ± SD | 0.80 ± 0.06 | 0.80 ± 0.06 | 0.951 | 0.009 |  | 0.81 ± 0.07 | 0.80 ± 0.07 | 0.413 | -0.203 |
| FeNO, ppb, mean ± SD | 13.12 ± 6.89 | 12.70 ± 6.31 | 0.573 | -0.066 |  | 10.28 ± 6.52 | 13.42 ± 6.62 | 0.061 | 0.475 |

Abbreviations: SMD Standardized mean difference
